# Supplementary material for: Long-Term Fertilization Strategy Impacts Rhizoctonia solani–Microbe Interactions in Soil and Rhizosphere and Defense Responses in Lettuce
Source: MDPI journal article supplement (doi:10.3390/microorganisms10091717), 2022-08-26
Supplement: s1 [file s1]

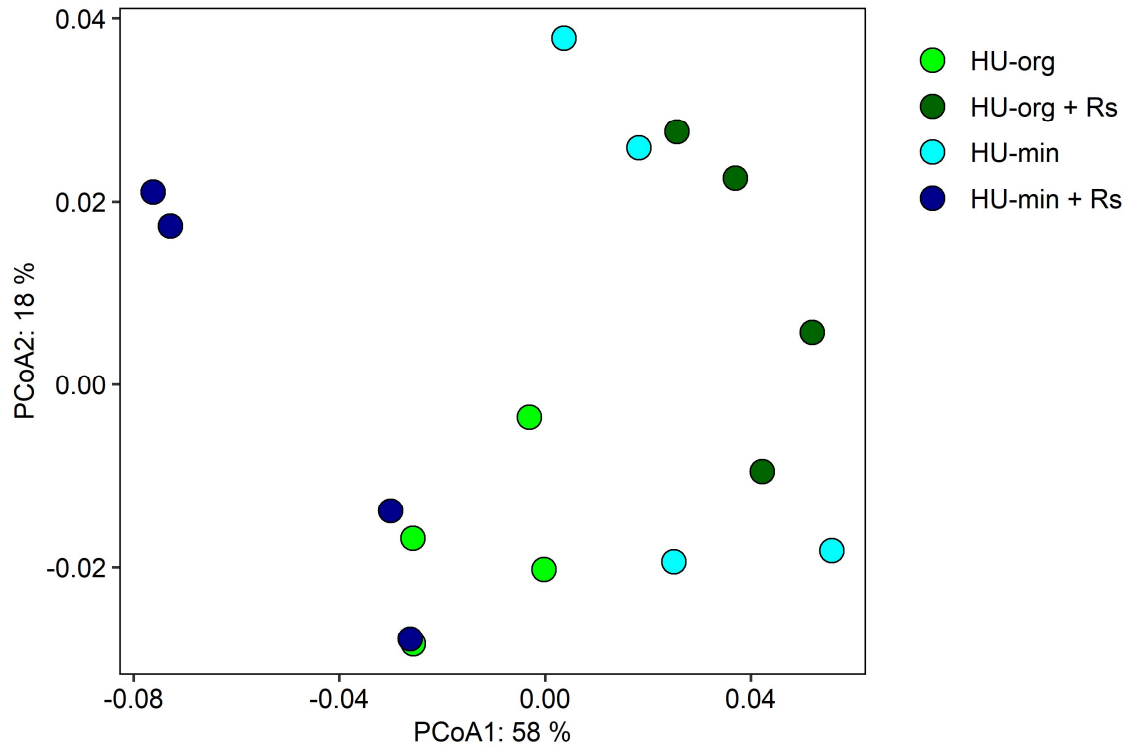

**Figure S1.** Principal coordinates analysis (PCoA, Bray-Curtis dissimilarity) based on the expression of 18 selected lettuce genes ( $\Delta C_t$  values) associated with oxidative and biotic stress signaling pathways. Lettuce (cv. Tizian) was grown in soils with long-term organic (HU-org) or mineral fertilization (HU-min), and in absence or presence of *Rhizoctonia solani* AG1-IB (HU-org+Rs, HU-min+Rs), respectively.

**Table S1.** List of plant genes selected for gene expression analysis with their corresponding loci, functions in *Arabidopsis thaliana* and primer sequences.

| Name of gene<br>(Locus tag in <i>A. thaliana</i> ) | Documented functions in <i>A. thaliana</i>                                                                                                                                | Primer sequences (5' -3')                                            |
|----------------------------------------------------|---------------------------------------------------------------------------------------------------------------------------------------------------------------------------|----------------------------------------------------------------------|
| <i>OPT3</i> (AT4G16370)                            | Iron transporter involved in systemic iron, zinc and cadmium distribution within the plant.                                                                               | OPTf - GGCTTGTCACCGGAATGATC<br>OPTr - TGCAAGGCGAAGAACAACAA           |
| <i>PR1</i><br>(AT2G14610)                          | Pathogenesis related protein 1, Salicylic acid (SA) dependent expression, involved in resistance against broad spectrum of pathogen.                                      | PR1f - GAGAAGGCCGATTATGATTA<br>PR1r - ATTATTGCATTGAACCCCTTG          |
| <i>PDF1.2</i><br>(AT5G44420)                       | Plant defensin factor involved in Jasmonic acid (JA)/ Ethylene (Et) dependent pathogen defense responses. Involved in Induced Systemic Resistance (ISR).                  | PDF1.2f - ACAAGATATGCGAGCGGAGA<br>PDF1.2r - TGACAGGCTCCATGTTTTGC     |
| <i>LOX1</i><br>(AT1G55020)                         | Lipoxygenase; upstream gene involved in the oxylipin metabolic pathway. Involved in the signaling of wounding response and JA induced defense against specific pathogens. | LOX1f - AAGAGCAGAAGCCACCCATA<br>LOX1r - GTGGAAGGAACTGCGAGAAG         |
| <i>WRKY70</i> (AT3G56400)                          | Transcription factor involved in both SA- and JA-mediated signal pathways. Also involved in abiotic stress signaling.                                                     | WRKY70f - GCACACACAAAACCGACCAA<br>WRKY70r - AGTTGTTGCAAGTATGGTGTCC   |
| <i>WRKY25</i> (AT2G30250)                          | Negative regulator of SA-mediated defense responses, elevated expression in response to oxidative stress, heat stress or wounding.                                        | WRKY25f - TGTTC AATGAGGAAGAAGGTGG<br>WRKY25r - TCGTTTGGTGGATTGTGGTTT |
| <i>MYC2</i><br>(AT1G32640)                         | JA-regulated transcription regulator involved in defense against bacterial pathogens/insect herbivory, flavonoid biosynthesis, and oxidative stress tolerance.            | MYCf - CGGGAGCTGAATTCATTGAT<br>MYCr - CTACCGTTGACGAACGACTG           |
| <i>ERF104</i><br>(AT5G61600)                       | Et- Response Factor family transcription factor. Involved in Et- signaling and resistance to necrotrophic pathogens.                                                      | ERF104f - AGAGGAGTAAGACAACGGCC<br>ERF104r - TTTTGCTGCATCTATGGCGG     |
| <i>PER50</i><br>(AT4G37520)                        | Peroxidase; response to environmental stresses such as wounding, pathogen attack and oxidative stress.                                                                    | PER50f - CTGTCAACACATGGGCTTCC<br>PER50r - TCCCACTTCGACCCGTTTAA       |
| <i>ERF6</i><br>(AT4G17490)                         | Et- Response Factor family transcription factor. Response to oxidative stress and biotic stress induced by biotrophic and necrotrophic pathogens.                         | ERF6f - CAAAACGTCGCGGATCTAGG<br>ERF6r - GACGCAACCTCAAGTGGAAG         |
| <i>ZAT10</i><br>(AT1G27730)                        | Zinc finger protein; transcriptional repressor involved in abiotic stress responses. Positive transcriptional regulator for salinity, heat and osmotic stress.            | ZATf - TCGTGACTCCTTCCACTTCC<br>ZATr - TAGGTGGACACAAGGCTAGC           |

|                              |                                                                                                                                                                                                                                                                                                                                                      |                                                                 |
|------------------------------|------------------------------------------------------------------------------------------------------------------------------------------------------------------------------------------------------------------------------------------------------------------------------------------------------------------------------------------------------|-----------------------------------------------------------------|
| <i>RbohF</i><br>(AT1G64060)  | Respiratory burst oxidase homolog F. Involved in hypersensitive reaction (HR)-related cell death and interact with intercellular ROS regulating pathogen defense responses.                                                                                                                                                                          | RbohFf - TCATCGGCTCTAAGAAGCCC<br>RbohFr - TGCTCCAGATGACGATTACCT |
| <i>GST6</i><br>(AT2G47730)   | Glutathione S-transferase expressed in response to auxin, SA and hydrogen peroxide. JA-independent induction by 12-oxo-phytodienoic acid (OPDA) in plant defense.                                                                                                                                                                                    | GST6f - GCCCAAATACTTGCTCTCCG<br>GST6r - TTGGGATGACTACCGACGAG    |
| <i>HSP70</i><br>(AT3G12580)  | Heat shock chaperone proteins induced by high light intensity, response to hydrogen peroxide, response to heat and 12-oxo-phytodienoic acid (OPDA) induced response to wounding.                                                                                                                                                                     | HSP70f - TTCGCCTCCACCTTCTTCTT<br>HSP70r - TCACCAACGACAAGGGAAGA  |
| <i>LEC</i><br>(AT3G15356)    | Legume lectin –like protein, appears to play a role in the JA/Et response, chitin-elicited defense responses.                                                                                                                                                                                                                                        | LEC1f - TCGTTCTCCACCTCTTTCGT<br>LEC1r - GTCCGAGATGTTGCGAAGAC    |
| <i>BGLU42</i><br>(AT5G36890) | The <i>BGLU42</i> gene encodes a $\beta$ -glucosidase belonging to the glycosyl hydrolase family 1 (GH1) from Arabidopsis and plays a role in response to abiotic stress. Plays a role in ISR response <i>via</i> iron-mobilizing phenolics, simulating root iron-deficiency response and changes in iron-homeostasis mechanisms in the rhizosphere. | BGLUf - AGCTGAAATTCAACACGCCT<br>BGLUr - GCAAGGTGGCGAAATAGGAT    |
| <i>MYB15</i><br>(AT3G23250)  | ABA inducible abiotic stress regulator, upregulated in cold and drought stress.                                                                                                                                                                                                                                                                      | MYB15nf - AGGTGGGGTTGAAGAAAGGA<br>MYB15nr - CGTACCAGCTTTTGAAGCA |
| <i>MYB10</i><br>(AT3G12820)  | JA/Ethylene-regulated, R2R3. Transcription factor involved in iron mediated response, and oxidative stress tolerance.                                                                                                                                                                                                                                | MYB10f - CTGGCGTTCTCTCCCAAAAC<br>MYB10r - CGACCAAAACCAATCGTGCT  |

**Table S2.** Primers used in this study for microbial community analysis.

| Template                            | Primer/Probe | Primer/Probe sequence (5' -3') /<br>Annealing-Temp. [°C] | Reference               |
|-------------------------------------|--------------|----------------------------------------------------------|-------------------------|
| 16S rRNA gene<br>(V3-V4, Illumina)  | 341F         | CCTAYGGGRBGCASCAG / 56°C                                 | Sundberg et al. 2013    |
|                                     | 806R         | GGACTACHVGGGTWTCTAAT / 56°C                              | Caporaso et al. 2011    |
| ITS2 region<br>(Illumina)           | ITS86F       | GTGAATCATCGAATCTTTGAA / 56°C                             | Op de Beeck et al. 2014 |
|                                     | ITS4         | TCCTCCGCTTATTGATATGC / 56°C                              | White et al. 1990       |
| <i>Rhizoctonia solani</i><br>(qPCR) | AG 1-IB-F3   | TGGCCTTTTAACATTGGCATGT / 62°C                            | Wallon et al. 2021      |
|                                     | AG 1-IB-R    | CCAACCCCAAAGGACCTTGA / 62°C                              |                         |

**Table S3.** Overview of used Illumina barcodes and ITS2 primer combinations for each sample in bulk soil (BS), root-associated soil (RA) and the rhizosphere (RH). Data are available in the European Nucleotide Archive (ENA), (<https://www.ebi.ac.uk/ena/browser/view/PRJEB53229>). + Rs – in the presence of *Rhizoctonia solani* AG1-IB, HU-min – mineral fertilization, HU-org – organic fertilization.

| Run        |               | Barcode + Primer (forward)                   | Barcode + Primer (reverse)                   |
|------------|---------------|----------------------------------------------|----------------------------------------------|
| ERR9808751 | ERR9808752    |                                              |                                              |
| HU-org_BS1 | HU-org_BS1+Rs | 5'- <u>AGGCGAAG</u> GTGAATCATCGAATCTTTGAA-3' | 5'- <u>ATTACTCGT</u> CTCTCCGCTTATTGATATGC-3' |
| HU-org_BS2 | HU-org_BS2+Rs |                                              | 5'- <u>TCCGGAGAT</u> CTCTCCGCTTATTGATATGC-3' |
| HU-org_BS3 | HU-org_BS3+Rs |                                              | 5'- <u>CGCTCATT</u> TCCTCCGCTTATTGATATGC-3'  |
| HU-org_BS4 | HU-org_BS4+Rs |                                              | 5'- <u>GAGATTCC</u> TCTCTCCGCTTATTGATATGC-3' |
| HU-org_RA1 | HU-org_RA1+Rs |                                              | 5'- <u>ATTCAGAA</u> TCCTCCGCTTATTGATATGC-3'  |
| HU-org_RA2 | HU-org_RA2+Rs |                                              | 5'- <u>GAATTCGT</u> TCCTCCGCTTATTGATATGC-3'  |
| HU-org_RA3 | HU-org_RA3+Rs |                                              | 5'- <u>CTGAAGCT</u> TCCTCCGCTTATTGATATGC-3'  |
| HU-org_RA4 | HU-org_RA4+Rs |                                              | 5'- <u>TAATGCGC</u> TCTCTCCGCTTATTGATATGC-3' |
| HU-org_RH1 | HU-org_RH1+Rs |                                              | 5'- <u>CGGCTATG</u> TCTCTCCGCTTATTGATATGC-3' |
| HU-org_RH2 | HU-org_RH2+Rs |                                              | 5'- <u>TCCGCGAA</u> TCCTCCGCTTATTGATATGC-3'  |
| HU-org_RH3 | HU-org_RH3+Rs |                                              | 5'- <u>TCTCGCGC</u> TCTCTCCGCTTATTGATATGC-3' |
| HU-org_RH4 | HU-org_RH4+Rs |                                              | 5'- <u>AGCGATAG</u> TCCTCCGCTTATTGATATGC-3'  |
| HU-min_BS1 | HU-min_BS1+Rs | 5'- <u>TAATCTTAG</u> TGAATCATCGAATCTTTGAA-3' | 5'- <u>ATTACTCGT</u> CTCTCCGCTTATTGATATGC-3' |
| HU-min_BS2 | HU-min_BS2+Rs |                                              | 5'- <u>TCCGGAGAT</u> CTCTCCGCTTATTGATATGC-3' |
| HU-min_BS3 | HU-min_BS3+Rs |                                              | 5'- <u>CGCTCATT</u> TCCTCCGCTTATTGATATGC-3'  |
| HU-min_BS4 | HU-min_BS4+Rs |                                              | 5'- <u>GAGATTCC</u> TCTCTCCGCTTATTGATATGC-3' |
| HU-min_RA1 | HU-min_RA1+Rs |                                              | 5'- <u>ATTCAGAA</u> TCCTCCGCTTATTGATATGC-3'  |
| HU-min_RA2 | HU-min_RA2+Rs |                                              | 5'- <u>GAATTCGT</u> TCCTCCGCTTATTGATATGC-3'  |
| HU-min_RA3 | HU-min_RA3+Rs |                                              | 5'- <u>CTGAAGCT</u> TCCTCCGCTTATTGATATGC-3'  |
| HU-min_RA4 | HU-min_RA4+Rs |                                              | 5'- <u>TAATGCGC</u> TCTCTCCGCTTATTGATATGC-3' |
| HU-min_RH1 | HU-min_RH1+Rs |                                              | 5'- <u>CGGCTATG</u> TCTCTCCGCTTATTGATATGC-3' |
| HU-min_RH2 | HU-min_RH2+Rs |                                              | 5'- <u>TCCGCGAA</u> TCCTCCGCTTATTGATATGC-3'  |
| HU-min_RH3 | HU-min_RH3+Rs |                                              | 5'- <u>TCTCGCGC</u> TCTCTCCGCTTATTGATATGC-3' |
| HU-min_RH4 | HU-min_RH4+Rs |                                              | 5'- <u>AGCGATAG</u> TCCTCCGCTTATTGATATGC-3'  |

**Table S4.** Nutritional status of lettuce (cv. Tizian) grown in soil under long-term mineral (HU-min) or organic (HU-org) fertilization strategy in absence and presence of the pathogen *Rhizoctonia solani* AG1-IB (+Rs). Values represent means of four repetitions  $\pm$  standard deviation. Means not sharing any letters are significantly different by the Tukey-test ( $p \leq 0.05$ ).

| Nutrients                                             | DT <sup>#</sup> | HU-min            | HU-min+Rs         | HU-org            | HU-org+Rs         |
|-------------------------------------------------------|-----------------|-------------------|-------------------|-------------------|-------------------|
| <b>Macro-nutrients</b> [g kg <sup>-1</sup> shoot DM]  |                 |                   |                   |                   |                   |
| N                                                     | 35              | 21.1 $\pm$ 0.1 a  | 20.6 $\pm$ 0.1 a  | 19.0 $\pm$ 0.1 a  | 23.7 $\pm$ 0.1 a  |
| P                                                     | 3.0             | 2.5 $\pm$ 0.9 a   | 2.2 $\pm$ 0.9 a   | 2.3 $\pm$ 0.9 a   | 2.7 $\pm$ 1.3 a   |
| K                                                     | 42              | 15.2 $\pm$ 5.9 a  | 14.2 $\pm$ 6.1 ab | 8.4 $\pm$ 4.1 c   | 10.6 $\pm$ 5.9 bc |
| Ca                                                    | 12              | 13.1 $\pm$ 1.2 a  | 12.9 $\pm$ 1.5 a  | 13.1 $\pm$ 1.0 a  | 15.1 $\pm$ 4.2 a  |
| Mg                                                    | 1.0             | 2.0 $\pm$ 0.6 ab  | 1.8 $\pm$ 0.6 b   | 2.6 $\pm$ 0.7 ab  | 2.9 $\pm$ 1.1 a   |
| S                                                     | 2.5             | 0.5 $\pm$ 0.3 a   | 0.4 $\pm$ 0.1 a   | 0.5 $\pm$ 0.2 a   | 0.5 $\pm$ 0.3 a   |
| <b>Micro-nutrients</b> [mg kg <sup>-1</sup> shoot DM] |                 |                   |                   |                   |                   |
| Cu                                                    | 2.5             | 2.0 $\pm$ 0.6 a   | 2.1 $\pm$ 0.5 a   | 3.0 $\pm$ 2.1 a   | 3.4 $\pm$ 1.7 a   |
| Fe                                                    | 50              | 49.1 $\pm$ 29.9 a | 28.3 $\pm$ 5.6 a  | 36.6 $\pm$ 5.8 a  | 36.5 $\pm$ 6.9 a  |
| Mn                                                    | 20              | 93.6 $\pm$ 40.6 a | 88.3 $\pm$ 33.4 a | 56.4 $\pm$ 16.0 a | 72.3 $\pm$ 33.1 a |
| Zn                                                    | 20              | 26.5 $\pm$ 8.3 a  | 24.0 $\pm$ 8.5 a  | 21.9 $\pm$ 12.6 a | 26.7 $\pm$ 14.5 a |

<sup>#</sup> Deficiency threshold (DT) for macronutrients and micronutrients [115]

**Table S5.** Bacterial alpha-diversity indices in bulk soil and rhizosphere of lettuce (cv. Tizian) grown in organic *vs.* mineral fertilized soil of HUB-LTE. A) *p*-values from two-way ANOVA showing the effects of fertilization strategy and inoculation as well as their interactions on alpha-diversity indices. B) Mean  $\pm$  standard deviation. Different letters indicate significant differences between treatments per index and habitat tested by two-way ANOVA – Tukey’s HSD test ( $p \leq 0.05$ ). Fertl – fertilization strategy, + Rs – in the presence of *Rhizoctonia solani* AG1-IB, HU-min – mineral fertilization, HU-org – organic fertilization.

| A)          |                      | Richness             |                 | Shannon         |  |
|-------------|----------------------|----------------------|-----------------|-----------------|--|
| Factor      | Bulk soil            | Rhizosphere          | Bulk soil       | Rhizosphere     |  |
| Fertl       | 0.124                | 0.891                | 0.693           | 0.890           |  |
| Rs          | 0.307                | 0.648                | 0.184           | 0.173           |  |
| Fertl x Rs  | 0.076                | 0.937                | 0.480           | 0.964           |  |
| B)          |                      | Richness             |                 | Shannon         |  |
| Treatment   | Bulk soil            | Rhizosphere          | Bulk soil       | Rhizosphere     |  |
| HU-min      | 2150.2 $\pm$ 67.2 a  | 1527.1 $\pm$ 365.5 a | 6.3 $\pm$ 0.1 a | 4.7 $\pm$ 1.2 a |  |
| HU-min + Rs | 2192.9 $\pm$ 130.8 a | 1600.0 $\pm$ 196.4 a | 6.2 $\pm$ 0.5 a | 5.3 $\pm$ 0.2 a |  |
| HU-org      | 2325.5 $\pm$ 65.2 a  | 1556.5 $\pm$ 256.4 a | 6.4 $\pm$ 0.2 a | 4.8 $\pm$ 0.9 a |  |
| HU-org + Rs | 2179.0 $\pm$ 109.9 a | 1607.8 $\pm$ 210.2 a | 6.0 $\pm$ 0.5 a | 5.4 $\pm$ 0.6 a |  |

**Table S6.** Relative abundance of the prevalent bacterial phyla (or proteobacterial classes) in organic *vs.* mineral fertilized soil of HUB-LTE separated per habitat (bulk soil and rhizosphere) of lettuce (cv. Tizian). Phyla with an average relative abundance of <1% were summarized as rare. *p*-values from two-way ANOVA and mean  $\pm$  standard deviation showing the effects of fertilization regime, inoculation and their interactions on phyla in A) bulk soil, B) root-associated soil and C) the rhizosphere. Different letters indicate significant differences between treatments per phylum and habitat tested by two-way ANOVA – Tukey’s HSD test ( $P \leq 0.05$ ). Data was transformed by Tukey’s Ladder of Power (indicated by †) if the ANOVA assumptions failed. Fertl – fertilization strategy, + Rs – in the presence of *Rhizoctonia solani* AG1-IB, HU-min – mineral fertilization, HU-org – organic fertilization.

| A) Bulk soil   |                  |                  |                    |                 |                               |                 |                   |                       |                      |                        |                       |                      |                       |                       |                 |
|----------------|------------------|------------------|--------------------|-----------------|-------------------------------|-----------------|-------------------|-----------------------|----------------------|------------------------|-----------------------|----------------------|-----------------------|-----------------------|-----------------|
| Factor         | Acido-bacteria   | Actino-bacteria  | Bacteria unclass.  | Bacteroidetes   | Candidatus Sacchari-bacteria† | Chloro-flexi    | Firmicutes        | Gemmati-monadetes     | Nitro-spirae†        | Verruco-microbia       | Alpha-proteo-bacteria | Beta-proteo-bacteria | Delta-proteo-bacteria | Gamma-proteo-bacteria | rare            |
| Fertl          | 0.285            | 0.195            | 0.094              | 0.139           | <0.001***                     | 0.092           | 0.372             | 0.268                 | 0.043*               | 0.762                  | 0.373                 | 0.721                | 0.054                 | 0.444                 | 0.041*          |
| Rs             | 0.141            | 0.213            | 0.937              | 0.649           | 0.534                         | 0.864           | 0.247             | 0.386                 | 0.537                | 0.887                  | 0.382                 | 0.826                | 0.554                 | 0.509                 | 0.202           |
| Fertl x Rs     | 0.725            | 0.555            | 0.197              | 0.676           | 0.535                         | 0.637           | 0.835             | 0.660                 | 0.363                | 0.854                  | 0.401                 | 0.716                | 0.307                 | 0.251                 | 0.335           |
| Treatment      | Acido-bacteria   | Actino-bacteria  | Bacteria unclass.  | Bacteroidetes   | Candidatus Sacchari-bacteria† | Chloro-flexi    | Firmicutes        | Gemmati-monadetes     | Nitro-spirae†        | Verruco-microbia       | Alpha-proteo-bacteria | Beta-proteo-bacteria | Delta-proteo-bacteria | Gamma-proteo-bacteria | rare            |
| HU-min         | 16.3 $\pm$ 1.9 a | 13.9 $\pm$ 0.9 a | 6.8 $\pm$ 0.8 a    | 2.2 $\pm$ 0.5 a | 3.2 $\pm$ 1.8 a               | 1.8 $\pm$ 0.5 a | 27.3 $\pm$ 6.4 a  | 2.4 $\pm$ 0.6 a       | 1.0 $\pm$ 0.1 a      | 1.7 $\pm$ 0 a          | 13.4 $\pm$ 2.6 a      | 3.1 $\pm$ 0.4 a      | 2 $\pm$ 0.3 a         | 3.8 $\pm$ 0.8 a       | 1.1 $\pm$ 0.4 a |
| HU-min+Rs      | 14.3 $\pm$ 3.3 a | 11.7 $\pm$ 2.5 a | 7.4 $\pm$ 1.6 a    | 2.2 $\pm$ 0.5 a | 2.1 $\pm$ 0.6 ab              | 1.9 $\pm$ 0.4 a | 34.2 $\pm$ 11.8 a | 2.3 $\pm$ 0.6 a       | 0.8 $\pm$ 0.2 a      | 1.7 $\pm$ 0.5 a        | 11.3 $\pm$ 2.3 a      | 3.3 $\pm$ 0.8 a      | 2.1 $\pm$ 0.5 a       | 3.6 $\pm$ 0.4 a       | 1.1 $\pm$ 0.2 a |
| HU-org         | 15.1 $\pm$ 4.0 a | 14.7 $\pm$ 1.6 a | 6.6 $\pm$ 0.7 a    | 2.6 $\pm$ 0.4 a | 0.9 $\pm$ 0.4 b               | 1.5 $\pm$ 0.5 a | 32.8 $\pm$ 9.0 a  | 2.2 $\pm$ 0.6 a       | 1.3 $\pm$ 0.4 a      | 1.7 $\pm$ 0.2 a        | 11.2 $\pm$ 1.4 a      | 3.4 $\pm$ 0.7 a      | 1.8 $\pm$ 0.2 a       | 3.2 $\pm$ 0.4 a       | 1.0 $\pm$ 0.2 a |
| HU-org+Rs      | 11.9 $\pm$ 3.6 a | 13.9 $\pm$ 3.2 a | 5.8 $\pm$ 0.6 a    | 2.8 $\pm$ 0.8 a | 0.9 $\pm$ 0.3 b               | 1.4 $\pm$ 0.2 a | 37.7 $\pm$ 11.0 a | 1.8 $\pm$ 0.7 a       | 1.5 $\pm$ 0.7 a      | 1.8 $\pm$ 0.6 a        | 11.2 $\pm$ 3.2 a      | 3.3 $\pm$ 0.6 a      | 1.5 $\pm$ 0.2 a       | 3.7 $\pm$ 0.7 a       | 0.7 $\pm$ 0.1 a |
| B) Rhizosphere |                  |                  |                    |                 |                               |                 |                   |                       |                      |                        |                       |                      |                       |                       |                 |
| Factor         | Acido-bacteria   | Actino-bacteria  | Bacteria unclass.† | Bacteroidetes   | Candidatus Sacchari-bacteria  | Chloro-flexi    | Firmicutes        | Alpha-proteobacteria  | Beta-proteobacteria  | Delta-proteobacteria†  | Gamma-proteobacteria  | rare                 |                       |                       |                 |
| Fertl          | 0.252            | 0.924            | 0.351              | 0.148           | 0.304                         | 0.293           | 0.980             | 0.631                 | 0.504                | 0.432                  | 0.019*                | 0.952                |                       |                       |                 |
| Rs             | 0.798            | 0.026*           | 0.574              | 0.988           | 0.383                         | 0.131           | 0.040*            | 0.056                 | 0.128                | 0.237                  | 0.006**               | 0.581                |                       |                       |                 |
| Fert x Rs      | 0.672            | 0.940            | 0.484              | 0.276           | 0.885                         | 0.238           | 0.727             | 0.474                 | 0.670                | 0.229                  | 0.118                 | 0.162                |                       |                       |                 |
| Treatment      | Acido-bacteria   | Actino-bacteria  | Bacteria unclass.† | Bacteroidetes   | Candidatus Sacchari-bacteria  | Chloro-flexi    | Firmicutes        | Alpha-proteo-bacteria | Beta-proteo-bacteria | Delta-proteo-bacteria† | Gamma-proteo-bacteria | rare                 |                       |                       |                 |
| HU-min         | 2.9 $\pm$ 1.4 a  | 5.4 $\pm$ 2.8 a  | 3.0 $\pm$ 1.5 a    | 5.8 $\pm$ 1.9 a | 3.3 $\pm$ 3.3 a               | 1.0 $\pm$ 0.6 a | 41.9 $\pm$ 23.1 a | 21.9 $\pm$ 10.6 a     | 7.7 $\pm$ 3.1 a      | 0.6 $\pm$ 0.3 a        | 4.5 $\pm$ 1.5 b       | 2.0 $\pm$ 0.5 a      |                       |                       |                 |
| HU-min+Rs      | 2.8 $\pm$ 1.1 a  | 8.7 $\pm$ 2.4 a  | 3.7 $\pm$ 0.8 a    | 6.9 $\pm$ 1.6 a | 4.4 $\pm$ 2.8 a               | 1.8 $\pm$ 0.5 a | 17.4 $\pm$ 12.3 a | 35.9 $\pm$ 7.5 a      | 9.8 $\pm$ 3.6 a      | 1.1 $\pm$ 0.6 a        | 5.7 $\pm$ 1.0 b       | 1.8 $\pm$ 0.6 a      |                       |                       |                 |
| HU-org         | 1.9 $\pm$ 1.1 a  | 5.4 $\pm$ 3.1 a  | 3.0 $\pm$ 0.4 a    | 8.4 $\pm$ 2.8 a | 2.2 $\pm$ 1.0 a               | 1.7 $\pm$ 0.4 a | 38.4 $\pm$ 22.4 a | 23.1 $\pm$ 12.3 a     | 8.1 $\pm$ 4.5 a      | 1.0 $\pm$ 0.1 a        | 5.2 $\pm$ 0.5 b       | 1.6 $\pm$ 0.3 a      |                       |                       |                 |
| HU-org+Rs      | 2.3 $\pm$ 0.8 a  | 8.4 $\pm$ 1.0 a  | 2.9 $\pm$ 0.5 a    | 7.2 $\pm$ 0.9 a | 3.1 $\pm$ 0.7 a               | 1.8 $\pm$ 0.8 a | 20.5 $\pm$ 12.9 a | 29.9 $\pm$ 8.0 a      | 11.9 $\pm$ 3.3 a     | 1.0 $\pm$ 0.3 a        | 8.7 $\pm$ 2.1 a       | 2.2 $\pm$ 1.0 a      |                       |                       |                 |

\* $p \leq 0.05$ , \*\* $p \leq 0.01$ , \*\*\* $p \leq 0.001$



**Table S7.** Fungal alpha-diversity indices in bulk soil (BS), root-associated soil (RA) and rhizosphere (RH) of lettuce (cv. Tizian) grown in organic *vs.* mineral fertilized soil of HUB-LTE. A) *p*-values from two-way ANOVA showing the effects of fertilization regime (Fertl) and inoculation (Rs) as well as their interactions on alpha-diversity indices. B) Mean  $\pm$  standard deviation. Different letters indicate significant differences between treatments per index and habitat tested by two-way ANOVA – Tukey’s HSD test ( $p \leq 0.05$ ). Data were transformed by Tukey’s Ladder of Power (indicated by †) if the ANOVA assumptions failed. Fertl – fertilization strategy, + Rs – in the presence of *Rhizoctonia solani* AG1-IB, HU-min – mineral fertilization, HU-org – organic fertilization.

| A)         |                    | Richness            |                    |                  | Shannon          |                 |
|------------|--------------------|---------------------|--------------------|------------------|------------------|-----------------|
| Factor     | BS                 | RA                  | RH                 | BS†              | RA               | RH              |
| Fertl      | 0.102              | <0.001***           | 0.065              | 0.011*           | 0.001**          | 0.173           |
| Rs         | 0.287              | 0.936               | 0.281              | 0.011*           | 0.206            | 0.194           |
| Fertl x Rs | 0.788              | 0.082               | 0.975              | 0.997            | 0.171            | 0.578           |
| B)         |                    | Richness            |                    |                  | Shannon          |                 |
| Treatment  | BS                 | RA                  | RH                 | BS†              | RA               | RH              |
| HU-min     | 314.0 $\pm$ 30.4 a | 319.0 $\pm$ 16.3 bc | 243.8 $\pm$ 41.4 a | 3.1 $\pm$ 1.0 ab | 3.0 $\pm$ 0.7 ab | 2.1 $\pm$ 0.9 a |
| HU-min+Rs  | 291.3 $\pm$ 21.2 a | 295.0 $\pm$ 23.3 c  | 221.0 $\pm$ 29.8 a | 2.2 $\pm$ 0.4 b  | 2.3 $\pm$ 0.4 b  | 1.7 $\pm$ 0.6 a |
| HU-org     | 338.5 $\pm$ 12.8 a | 351.5 $\pm$ 30.8 ab | 283.0 $\pm$ 30.5 a | 3.9 $\pm$ 0.2 a  | 3.6 $\pm$ 0.5 a  | 3.0 $\pm$ 0.7 a |
| HU-org+Rs  | 324.8 $\pm$ 52.5 a | 373.5 $\pm$ 24.4 a  | 261.5 $\pm$ 51.2 a | 3.1 $\pm$ 1.2 ab | 3.6 $\pm$ 0.1 a  | 2.1 $\pm$ 1.2 a |

\* $p \leq 0.05$ , \*\* $p \leq 0.01$ , \*\*\* $p \leq 0.001$

**Table S8.** Relative abundance of the prevalent fungal phyla in organic *vs.* mineral fertilized soil of HUB-LTE separated per habitat (bulk soil, root-associated soil and rhizosphere) of lettuce (cv. Tizian). Phyla with an average relative abundance of <0.1% were summarized as rare. *p*-values from two-way ANOVA as well as mean  $\pm$  standard deviation showing the effects of fertilization regime, inoculation and their interactions on phyla in A) bulk soil, B) root-associated soil and C) the rhizosphere. Different letters indicate significant differences between treatments per phylum and habitat tested by two-way ANOVA – Tukey’s HSD test ( $p \leq 0.05$ ). Data was transformed by Tukey’s Ladder of Power (indicated by †) if the ANOVA assumptions failed. Fertl – fertilization strategy, + Rs – in the presence of *Rhizoctonia solani* AG1-IB, HU-min – mineral fertilization, HU-org – organic fertilization.

| A) Bulk soil            |                    |                  |                   |                 |                    |                     |                 |                 |
|-------------------------|--------------------|------------------|-------------------|-----------------|--------------------|---------------------|-----------------|-----------------|
| Factor                  | Asco-mycota        | Basidio-mycota   | Chytridio-mycota  | Glomero-mycota† | Mucuro-mycota†     | Mortierello-mycota† | Olpidio-mycota  | rare            |
| Fertl                   | 0.001**            | 0.325            | <0.001***         | 0.002**         | <0.001***          | 0.004**             | 0.069           | 0.023*          |
| Rs                      | 0.725              | 0.133            | 0.255             | 0.809           | 0.744              | 0.036*              | 0.901           | 0.238           |
| Fertl x Rs              | 0.089              | 0.665            | 0.269             | 0.901           | 0.116              | 0.961               | 0.002**         | 0.883           |
| Treatment               | Asco-mycota        | Basidio-mycota   | Chytridio-mycota  | Glomero-mycota† | Mucuro-mycota†     | Mortierello-mycota† | Olpidio-mycota  | rare            |
| HU-min                  | 43.2 $\pm$ 19.9 ab | 13.4 $\pm$ 5.6 a | 0.1 $\pm$ 0.1 b   | 0 $\pm$ 0 b     | 31.6 $\pm$ 29.5 ab | 11.4 $\pm$ 5.2 ab   | 0 $\pm$ 0 b     | 0.4 $\pm$ 0.3 a |
| HU-min+Rs               | 26.9 $\pm$ 9.3 b   | 8.2 $\pm$ 3.2 a  | 0.1 $\pm$ 0.1 b   | 0 $\pm$ 0 ab    | 58.6 $\pm$ 11.4 a  | 6.1 $\pm$ 2.0 b     | 0 $\pm$ 0 ab    | 0.2 $\pm$ 0.1 a |
| HU-org                  | 60.1 $\pm$ 9.0 a   | 14.8 $\pm$ 1.8 a | 0.8 $\pm$ 0.2 a   | 0.1 $\pm$ 0.1 a | 6.8 $\pm$ 9.6 bc   | 16.3 $\pm$ 1.0 a    | 0 $\pm$ 0 a     | 1.0 $\pm$ 0.7 a |
| HU-org+Rs               | 71.1 $\pm$ 17.5 a  | 11.9 $\pm$ 7.6 a | 0.6 $\pm$ 0.3 a   | 0.3 $\pm$ 0.4 a | 3.4 $\pm$ 4.9 c    | 12.1 $\pm$ 7.1 ab   | 0 $\pm$ 0 ab    | 0.7 $\pm$ 0.5 a |
| B) Root-associated soil |                    |                  |                   |                 |                    |                     |                 |                 |
| Factor                  | Asco-mycota        | Basidio-mycota†  | Chytridio-mycota† | Glomero-mycota† | Mucuro-mycota      | Mortierello-mycota  | Olpidio-mycota  | rare†           |
| Fertl                   | <0.001***          | 0.225            | 0.002**           | <0.001***       | <0.001***          | 0.008**             | 0.719           | <0.001***       |
| Rs                      | 0.970              | 0.881            | 0.293             | 0.381           | 0.659              | 0.185               | 0.276           | 0.816           |
| Fertl x Rs              | 0.032*             | 0.436            | 0.308             | 0.100           | 0.075              | 0.789               | 0.810           | 0.946           |
| Treatment               | Asco-mycota        | Basidio-mycota†  | Chytridio-mycota† | Glomero-mycota† | Mucuro-mycota      | Mortierello-mycota  | Olpidio-mycota  | rare†           |
| HU-min                  | 39.4 $\pm$ 8.5 bc  | 13.0 $\pm$ 9.8 a | 0.3 $\pm$ 0.2 b   | 0.1 $\pm$ 0.1 b | 37.2 $\pm$ 21.5 ab | 9.7 $\pm$ 4.2 ab    | 0.1 $\pm$ 0.1 a | 0.2 $\pm$ 0.1 b |
| HU-min+Rs               | 26.8 $\pm$ 5.8 c   | 9.2 $\pm$ 3.0 a  | 0.3 $\pm$ 0.2 b   | 0.1 $\pm$ 0 b   | 56.0 $\pm$ 7.4 a   | 7.3 $\pm$ 2.1 b     | 0.1 $\pm$ 0.1 a | 0.2 $\pm$ 0 b   |
| HU-org                  | 53.5 $\pm$ 16.3 ab | 11.7 $\pm$ 3.8 a | 1.5 $\pm$ 1.1 a   | 0.4 $\pm$ 0.2 a | 18.1 $\pm$ 19.7 b  | 14.0 $\pm$ 2.9 a    | 0.2 $\pm$ 0.1 a | 0.6 $\pm$ 0.3 a |
| HU-org+Rs               | 66.5 $\pm$ 8.5 a   | 12.8 $\pm$ 1.6 a | 0.6 $\pm$ 0.1 ab  | 0.7 $\pm$ 0.3 a | 6.4 $\pm$ 8.7 b    | 12.3 $\pm$ 1.8 ab   | 0.1 $\pm$ 0.0 a | 0.6 $\pm$ 0.1 a |
| C) Rhizosphere          |                    |                  |                   |                 |                    |                     |                 |                 |
| Factor                  | Asco-mycota        | Basidio-mycota†  | Chytridio-mycota† | Glomero-mycota† | Mucuro-mycota      | Mortierello-mycota  | Olpidio-mycota† | rare            |

|                  |                         |                             |                               |                             |                           |                                |                             |             |
|------------------|-------------------------|-----------------------------|-------------------------------|-----------------------------|---------------------------|--------------------------------|-----------------------------|-------------|
| Fertl            | <0.001***               | 0.625                       | 0.012*                        | 0.002**                     | <0.001***                 | 0.854                          | 0.976                       | 0.963       |
| Rs               | 0.468                   | 0.809                       | 0.039*                        | 0.830                       | 0.818                     | 0.653                          | 0.148                       | 0.156       |
| Fertl x Rs       | 0.058                   | 0.967                       | 0.322                         | 0.180                       | 0.122                     | 0.594                          | 0.852                       | 0.641       |
| <b>Treatment</b> | <b>Asco-<br/>mycota</b> | <b>Basidio-<br/>mycota†</b> | <b>Chytridio-<br/>mycota†</b> | <b>Glomero-<br/>mycota†</b> | <b>Mucuro-<br/>mycota</b> | <b>Mortierello-<br/>mycota</b> | <b>Olpidio-<br/>mycota†</b> | <b>rare</b> |
| HU-min           | 32.8 ± 11.3 b           | 11.3 ± 17.1 a               | 0.1 ± 0.1 ab                  | 0 ± 0 b                     | 51.6 ± 31.0 ab            | 3.5 ± 3.5 a                    | 0.7 ± 0.2 a                 | 0.1 ± 0.1 a |
| HU-min+Rs        | 24.7 ± 11.3 b           | 3.8 ± 2.4 a                 | 0 ± 0 b                       | 0.3 ± 0.5 ab                | 65.6 ± 14.7 a             | 3.6 ± 2.4 a                    | 1.8 ± 2.3 a                 | 0.3 ± 0.3 a |
| HU-org           | 70.5 ± 16.8 a           | 3.2 ± 1.7 a                 | 0.2 ± 0.1 a                   | 1.5 ± 1.0 a                 | 19.3 ± 19.1 bc            | 4.5 ± 2.1 a                    | 0.6 ± 0.2 a                 | 0.1 ± 0.1 a |
| HU-org+Rs        | 87.7 ± 6.9 a            | 5.8 ± 7.6 a                 | 0.1 ± 0 ab                    | 1.7 ± 2.5 a                 | 0.7 ± 0.3 c               | 3.1 ± 3.1 a                    | 0.8 ± 0.2 a                 | 0.2 ± 0.3 a |

\* $p \leq 0.05$ , \*\* $p \leq 0.01$ , \*\*\* $p \leq 0.001$

**Table S9.** Fungal genera *Thanatephorus* and *Waitea* in bulk soil (BS), root-associated soil (RA) and rhizosphere (RH) of lettuce (cv. Tizian) were analyzed by likelihood ratio tests under negative binomial distribution and generalized linear models (edgeR, FDR < 0.05) separately per habitat depending on long-term organic *vs.* mineral fertilization practice of HUB-LTE A) in the absence and B) in the presence of *Rhizoctonia solani* AG1-IB (Rs) as well as in absence *vs.* presence of *R. solani* AG1-IB (Rs) C) in organic and D) in mineral fertilized soils. HU-min – mineral fertilization, HU-org – organic fertilization. Relative abundances are displayed as mean  $\pm$  standard deviation. Bold numbers indicate significant enrichment.

| A)                   |               | Bulk Soil     |               | Root-associated Soil |               | Rhizosphere   |  |
|----------------------|---------------|---------------|---------------|----------------------|---------------|---------------|--|
| Genus                | HU-org        | HU-min        | HU-org        | HU-min               | HU-org        | HU-min        |  |
| <i>Thanatephorus</i> | n.d.          | n.d.          | n.d.          | n.d.                 | 0.002 ± 0.001 | n.d.          |  |
| <i>Waitea</i>        | 0 ± 0.001     | n.d.          | 0.064 ± 0.119 | 0 ± 0.001            | 0.003 ± 0.003 | n.d.          |  |
| B)                   |               | Bulk Soil     |               | Root-associated Soil |               | Rhizosphere   |  |
| Genus                | HU-org+Rs     | HU-min+Rs     | HU-org+Rs     | HU-min+Rs            | HU-org+Rs     | HU-min+Rs     |  |
| <i>Thanatephorus</i> | 0.017 ± 0.035 | 0.001 ± 0.002 | 0 ± 0.001     | n.d.                 | 0.003 ± 0.004 | n.d.          |  |
| <i>Waitea</i>        | 1.286 ± 2.538 | 0.008 ± 0.015 | 0.016 ± 0.008 | n.d.                 | 0.008 ± 0.006 | n.d.          |  |
| C)                   |               | Bulk Soil     |               | Root-associated Soil |               | Rhizosphere   |  |
| Genus                | HU-org        | HU-org+Rs     | HU-org        | HU-org+Rs            | HU-org        | HU-org+Rs     |  |
| <i>Thanatephorus</i> | n.d.          | 0.017 ± 0.035 | n.d.          | 0 ± 0.001            | 0.002 ± 0.001 | 0.003 ± 0.004 |  |
| <i>Waitea</i>        | 0 ± 0.001     | 1.286 ± 2.538 | 0.064 ± 0.119 | 0.016 ± 0.008        | 0.003 ± 0.003 | 0.008 ± 0.006 |  |
| D)                   |               | Bulk Soil     |               | Root-associated Soil |               | Rhizosphere   |  |
| Genus                | HU-min        | HU-min+Rs     | HU-min        | HU-min+Rs            | HU-min        | HU-min+Rs     |  |
| <i>Thanatephorus</i> | n.d.          | 0.001 ± 0.002 | n.d.          | n.d.                 | n.d.          | n.d.          |  |
| <i>Waitea</i>        | n.d.          | 0.008 ± 0.015 | 0 ± 0.001     | n.d.                 | n.d.          | n.d.          |  |

n.d. no sequences in any of the four replicates were detected
